# Supplementary material for: Thrombin binding aptamer G-quadruplex stabilized by pyrene-modified nucleotides
Source: PubMed Central journal article supplement — Nucleic Acids Res. 2020 Feb 25;48(7):3975–86. doi: 10.1093/nar/gkaa118 (PMC7144916; doi:10.1093/nar/gkaa118), 2020-02-25
Supplement: gkaa118_supplemental_file.pdf [file gkaa118_supplemental_file.pdf]

## Supporting Information

### Thrombin binding aptamer G-quadruplex stabilized by pyrene-modified nucleotides

*Matic Kovačič<sup>1</sup>, Peter Podbevšek<sup>1,2</sup>, Hisae Tateishi-Karimata<sup>3</sup>, Shuntaro Takahashi<sup>3</sup>, Naoki Sugimoto<sup>3,4,\*</sup> and Janez Plavec<sup>1,2,5,\*</sup>*

1 Slovenian NMR Center, National Institute of Chemistry, Hajdrihova 19, SI-1000 Ljubljana, Slovenia

2 EN-FIST Centre of Excellence, Trg OF 13, SI-1000 Ljubljana, Slovenia

3 Frontier Institute for Biomolecular Engineering Research (FIBER), Konan University, 7-1-20 Minatojima-minamimachi, Chuo-ku, Kobe 650-0047, Japan

4 Graduate School of Frontiers of Innovative Research in Science and Technology (FIRST), Konan University, 7-1-20 Minatojima-minamimachi, Chuo-ku, Kobe 650-0047, Japan

5 Faculty of Chemistry and Chemical Technology, University of Ljubljana, Večna pot 113, SI-1000 Ljubljana, Slovenia

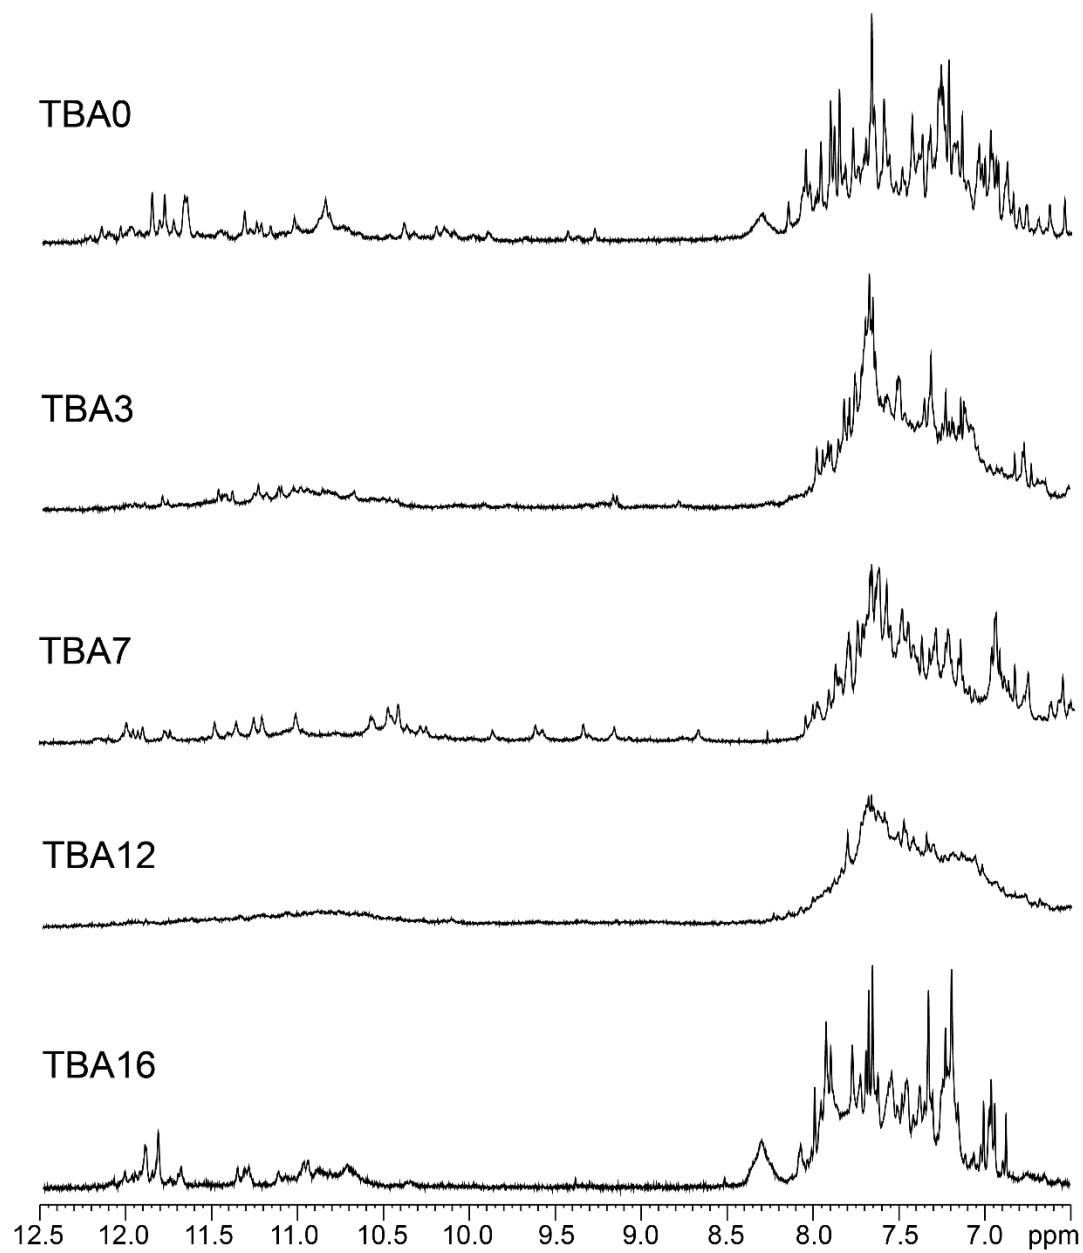

**Figure S1.** Imino and aromatic regions of  $^1\text{H}$  NMR spectra of TBA0, TBA3, TBA7, TBA12 and TBA16 in a 50 mM KCl solution at 25 °C.

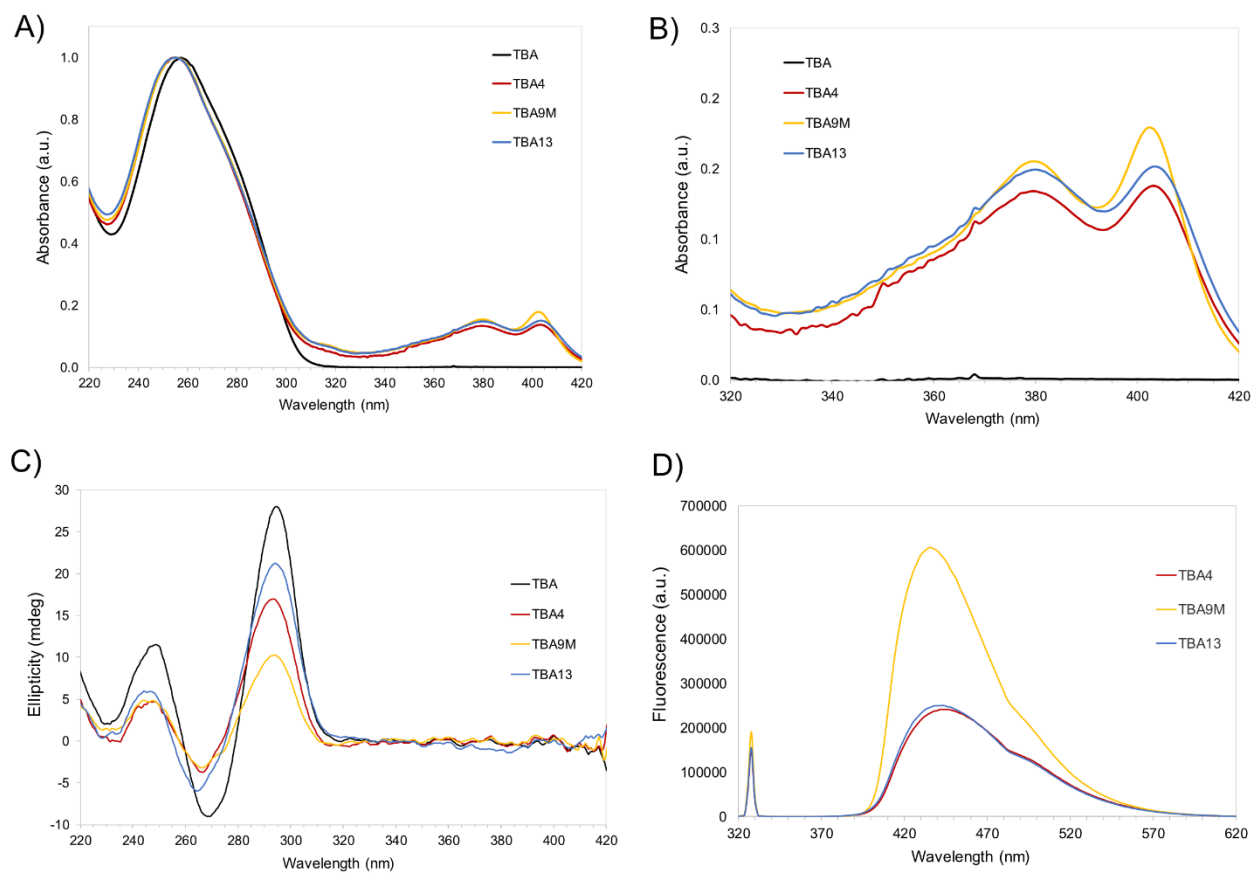

**Figure S2.** A,B) Normalized absorbance spectra of TBA, TBA4, TBA9<sup>M</sup> and TBA13 samples. C) CD-spectra of 50  $\mu$ M TBA, TBA9<sup>M</sup> and TBA13. D) Fluorescence emission spectra of monomeric 150  $\mu$ M TBA4, TBA9<sup>M</sup> and TBA13 G-quadruplexes in 50 mM KCl solution at 25  $^{\circ}$ C. Excitation wavelength of 330 nm was used.

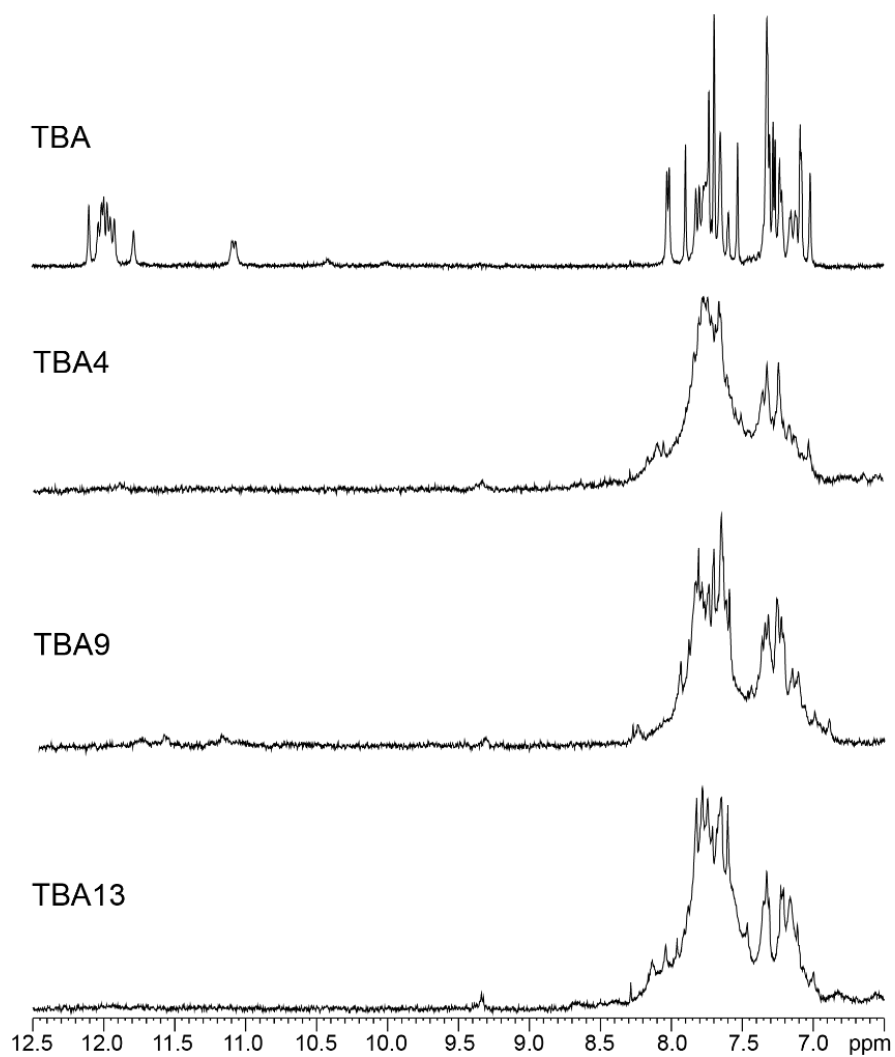

**Figure S3.** Imino and aromatic regions of  $^1\text{H}$  NMR spectra of TBA, TBA4, TBA9 and TBA13 in a 50 mM NaCl solution at 25 °C.

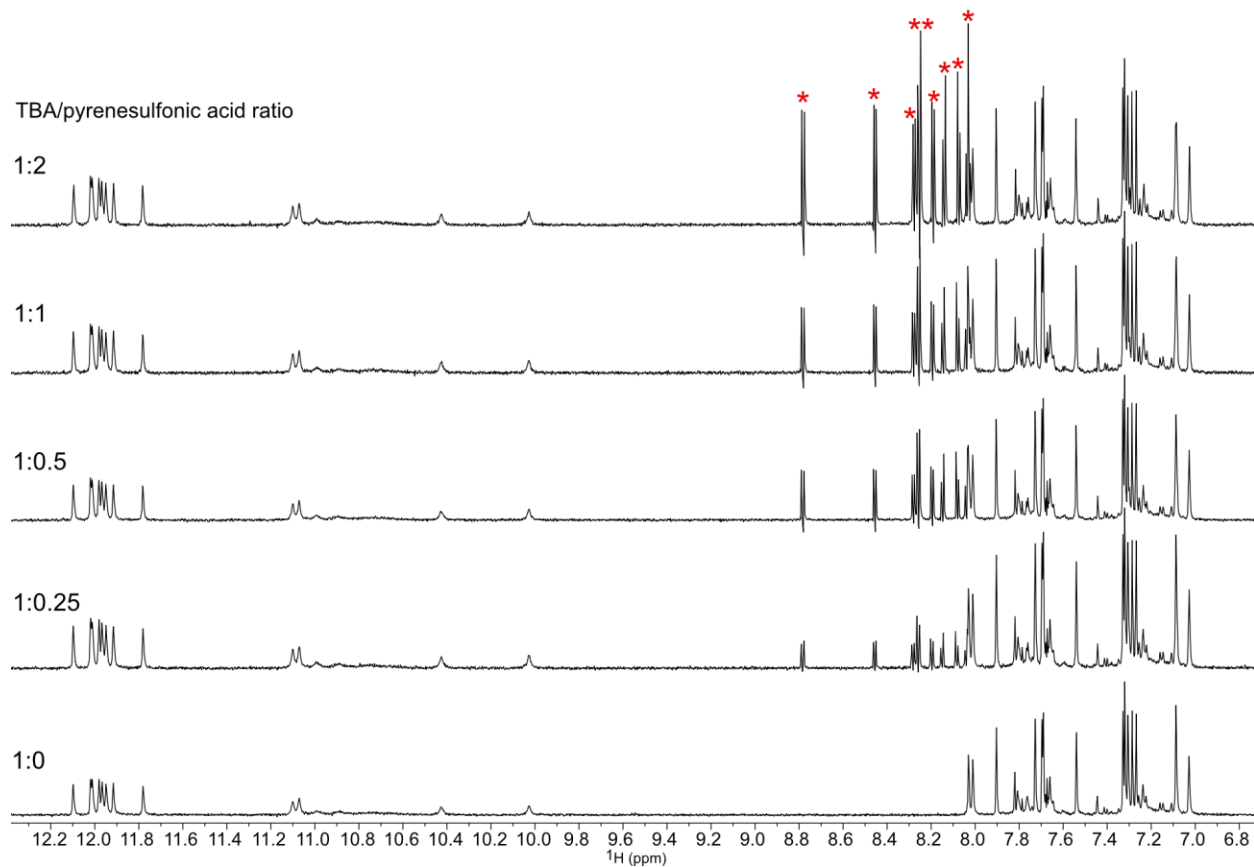

**Figure S4.** Imino and aromatic regions of <sup>1</sup>H NMR spectra of 100 μM TBA sample in a 50 mM KCl solution at 25 °C with increasing additions of 1-pyrenesulfonic acid sodium salt. Proton signals of pyrene group are marked with red asterisks.

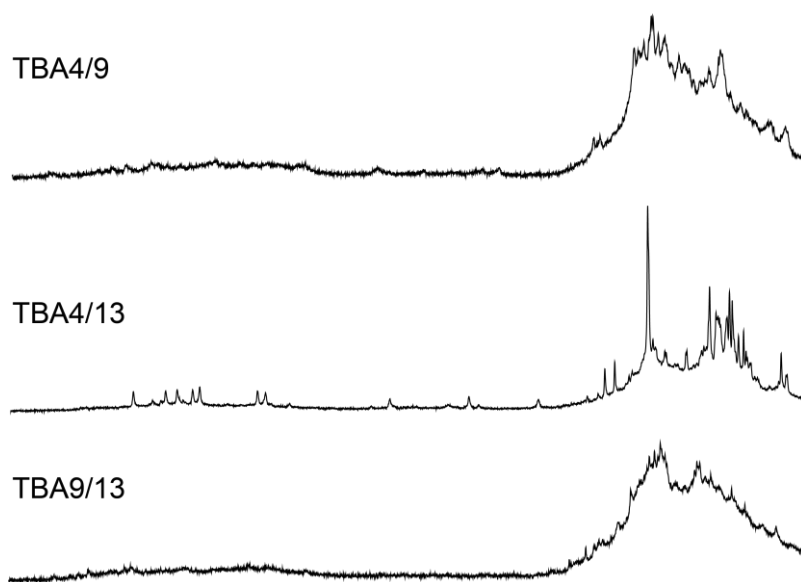

**Figure S5.** Imino and aromatic regions of <sup>1</sup>H NMR spectra of TBA4/9, TBA4/13 and TBA9/13 in a 50 mM KCl solution at 25 °C.

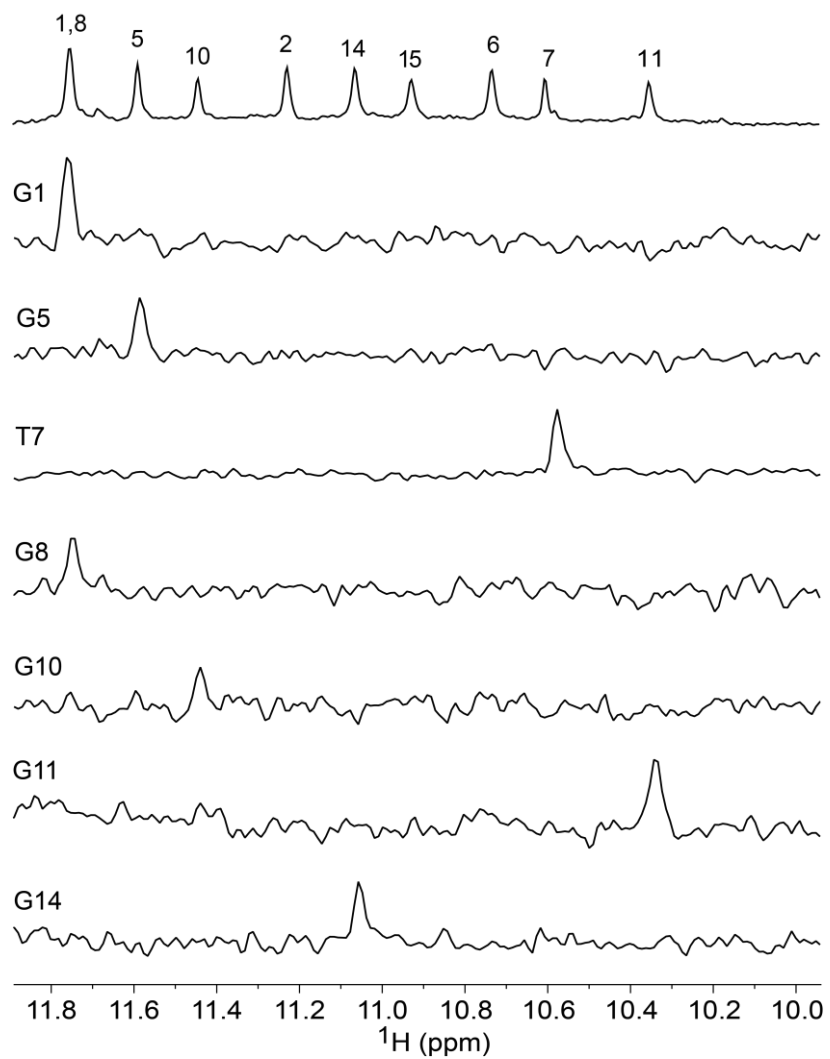

**Figure S6.** Imino regions of 1D  $^{15}\text{N}$ -edited HSQC NMR spectra of site-specifically labeled TBA9<sup>D</sup> in a 100 mM KCl solution at 25 °C.

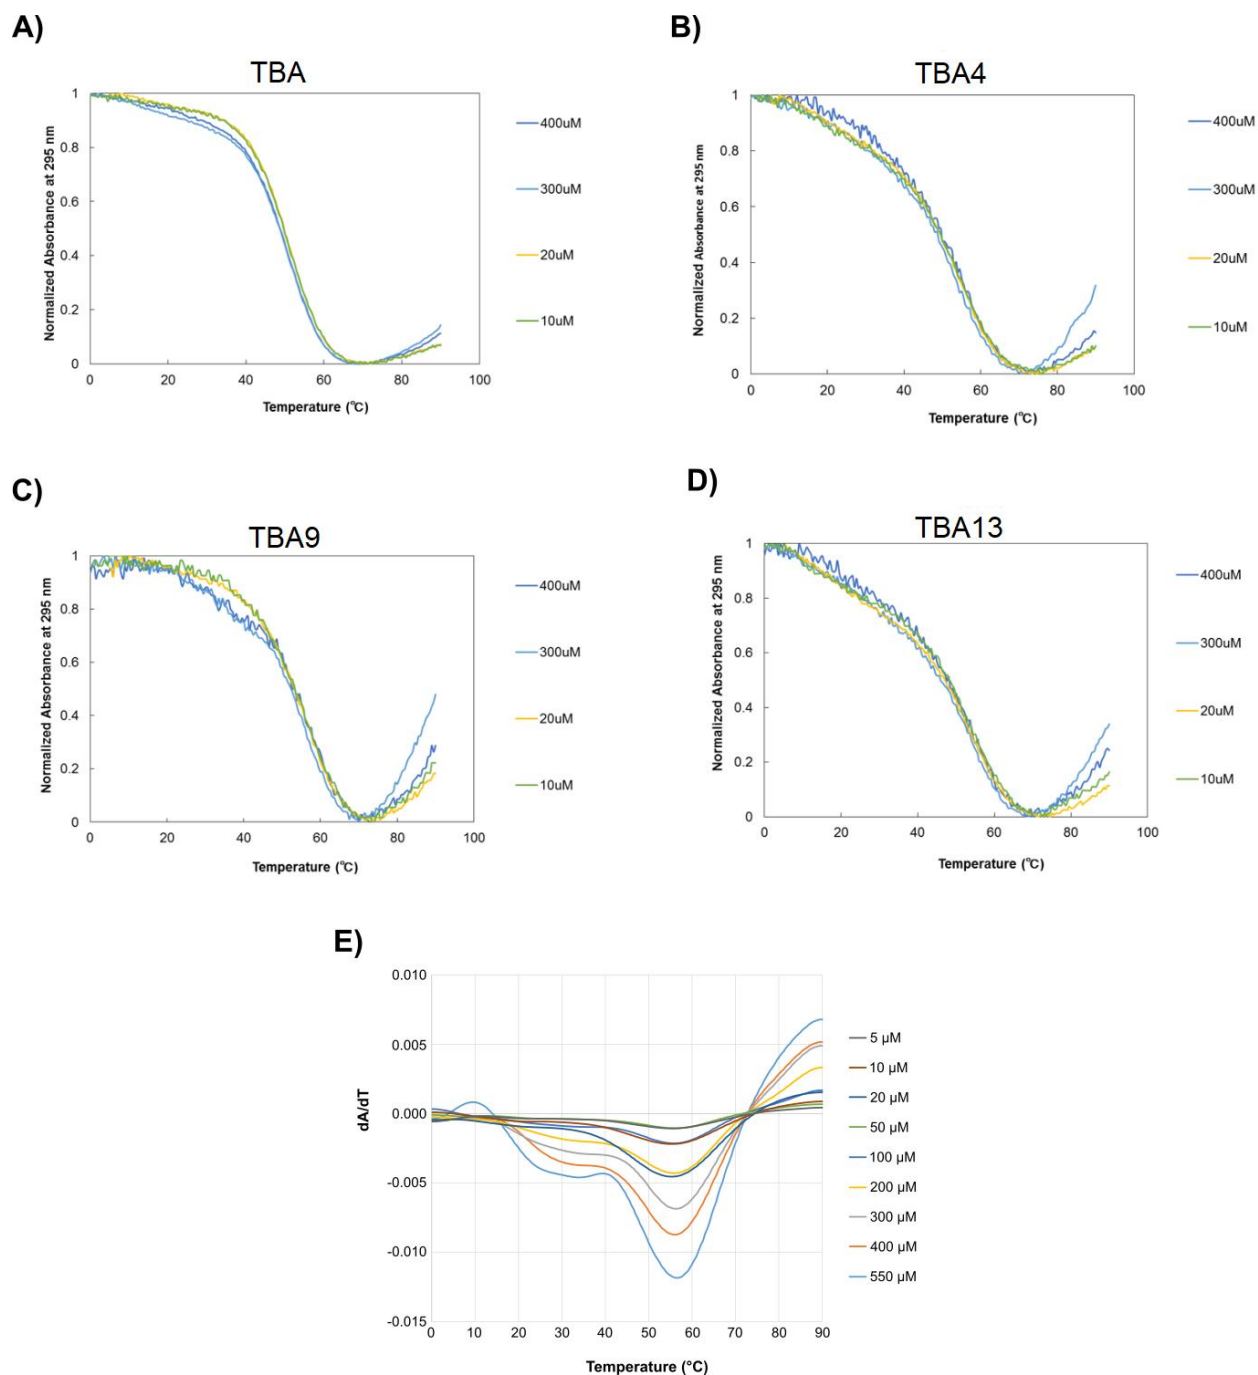

**Figure S7.** (A-D) Normalized UV melting curves for TBA, TBA4, TBA9 and TBA13 at 10, 20, 300 and 400  $\mu\text{M}$  oligonucleotide concentrations in a buffer containing 50 mM KCl. (E) First derivative of absorbance at 295 nm vs temperature for TBA9 at different oligonucleotide concentrations.



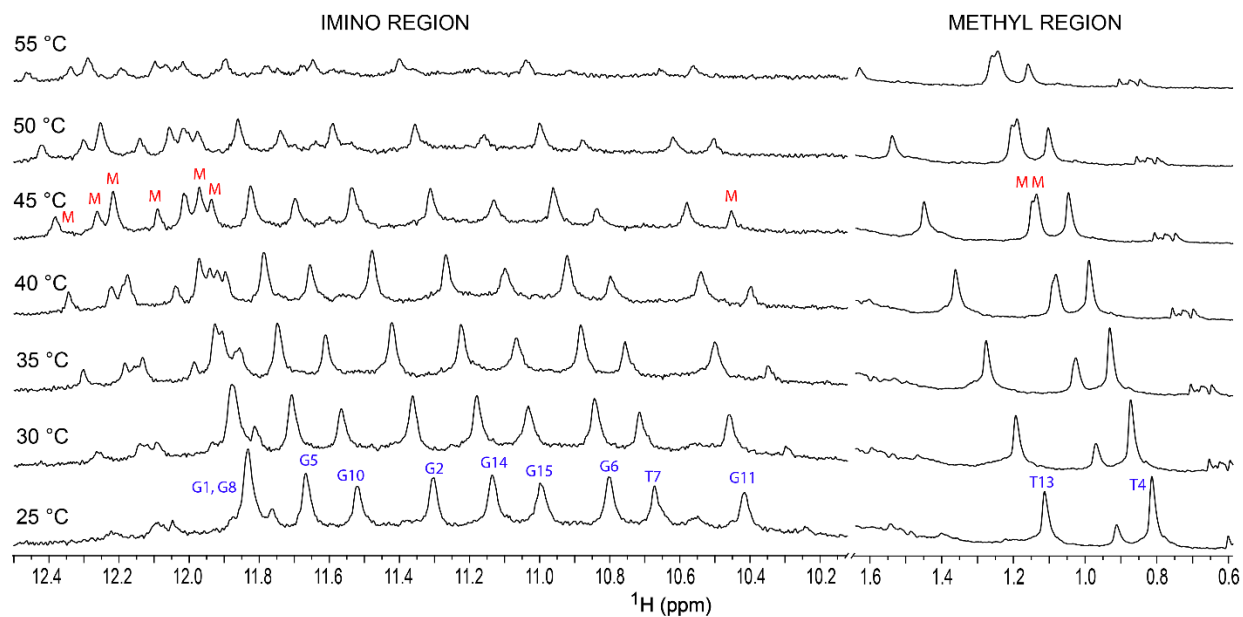

**Figure S8.** Imino and methyl regions of  $^1\text{H}$  NMR spectra of TBA9 in a 100 mM KCl solution at temperatures ranging from 25 to 55  $^{\circ}\text{C}$ .

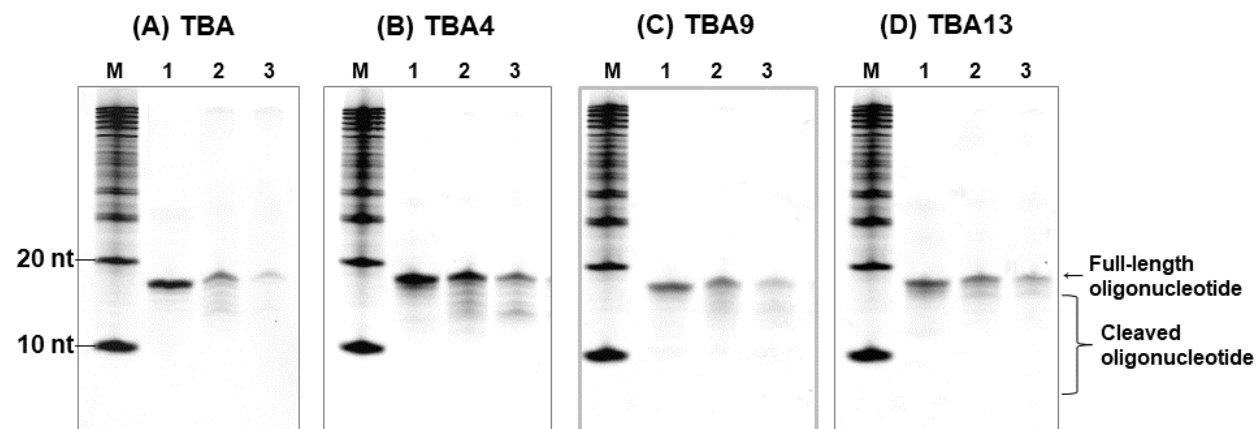

**Figure S9.** Denaturing gel electrophoresis of (a) TBA, (b) TBA4, (c) TBA9, and (d) TBA13 after the addition of human serum at 37  $^{\circ}\text{C}$ . Samples incubated for 0, 1, and 3 hours were loaded on lanes 1 to 3, respectively. Lane M indicated a DNA size maker.

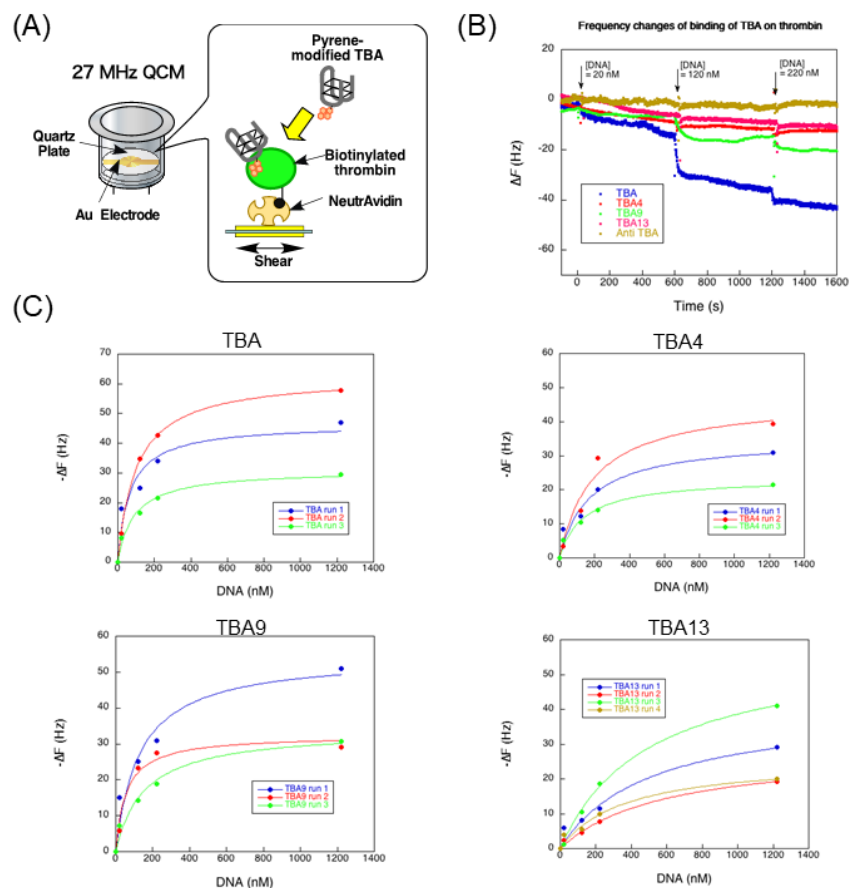

**Figure S10.** Binding assay of pyrene-modified TBA to human thrombin immobilized on quartz crystal microbalance (QCM). (A) Schematic illustration of assay for the binding of pyrene-modified TBA to thrombin by using QCM. (B) Frequency changes of QCM by the addition of native TBA (blue), TBA4 (red), TBA9<sup>M</sup> (green), and TBA13 (pink). As a control experiment, antisense of the TBA sequence (Anti TBA; yellow) was injected. Black arrows indicate the timings of injection of the DNAs with the indicated amount. (C) Binding isotherms of pyrene-modified TBA to thrombin immobilized on QCM. All the data were corrected from three individual experiments. All the assays were carried out in potassium buffer pH 6.9 at 25 °C. The plots were fitted by Langmuir adsorption model as follows:  $-\Delta F = [\text{DNA}] * (-\Delta F_{\text{max}}) / ([\text{DNA}] + K_D)$ .

**Table S1.** Degradation results of TBA oligonucleotides under human serum conditions.

| Oligonucleotide | Incubation time<br>(hours) | Extend of degradation<br>(%) |
|-----------------|----------------------------|------------------------------|
| TBA             | 0                          | 100                          |
|                 | 1                          | 41.6                         |
|                 | 3                          | 10.0                         |
| TBA4            | 0                          | 100                          |
|                 | 1                          | 72.5                         |
|                 | 3                          | 39.8                         |
| TBA9            | 0                          | 100                          |
|                 | 1                          | 67.5                         |
|                 | 3                          | 28.4                         |
| TBA13           | 0                          | 100                          |
|                 | 1                          | 70.2                         |
|                 | 3                          | 39.2                         |

**Table S2.** Binding parameters of pyrene-modified TBA analogues to thrombin immobilized on QCM.

| Oligonucleotide | K <sub>D</sub> (nM) |
|-----------------|---------------------|
| TBA             | 85.1 ± 17.7         |
| TBA4            | 166 ± 29.3          |
| TBA9            | 93.6 ± 51.0         |
| TBA13           | 523 ± 91.6          |
| Anti TBA*       | No binding          |

\*Non-binding control DNA sequence is complementary to TBA.
